# Supplementary material for: Analysis of the Drivers of Highway Construction Companies Adopting Smart Construction Technology
Source: MDPI journal article supplement (doi:10.3390/su15010703), 2022-12-30
Supplement: s1 [file s1]

Archive with 1 entries (1 files):
- sustainability-2063313-supplementary.pdf
